# Supplementary material
Source: PubMed Central journal article supplement (PMC2926161)

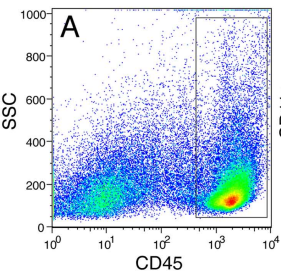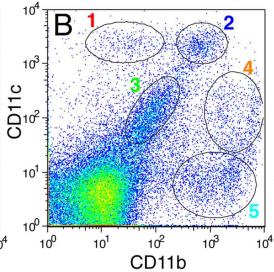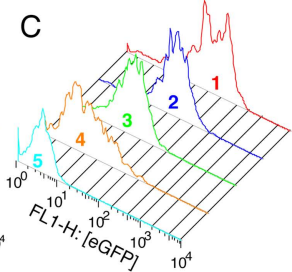

Supplement: NIHMS210337-supplement-04.pdf [file NIHMS210337-supplement-04.pdf]

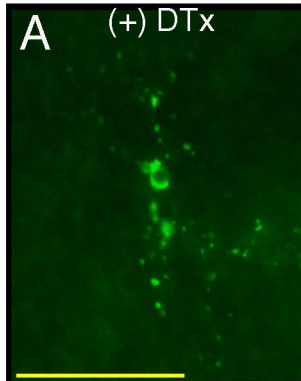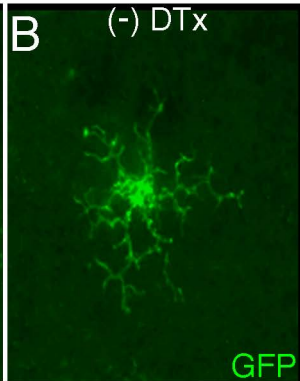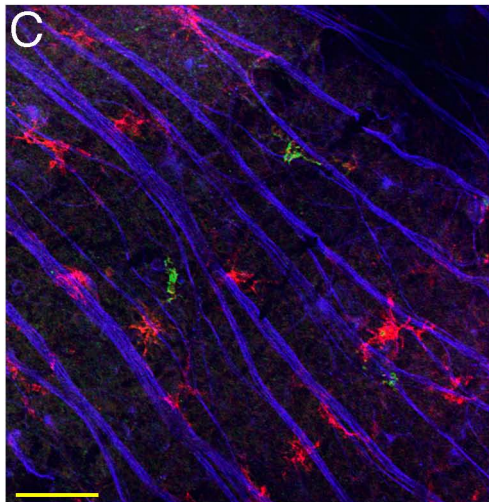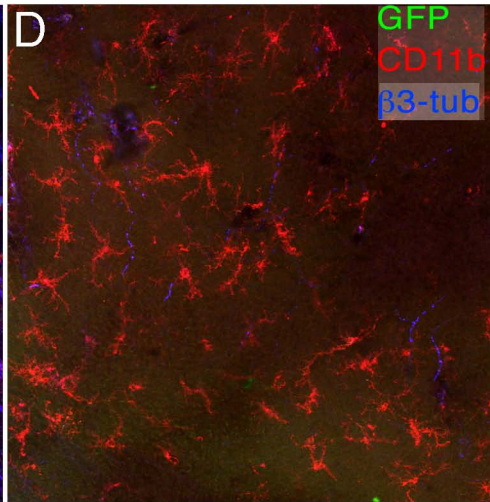

Supplement: NIHMS210337-supplement-05.pdf [file NIHMS210337-supplement-05.pdf]
